# Supplementary material
Source: PubMed Central journal article supplement (PMC1472512)

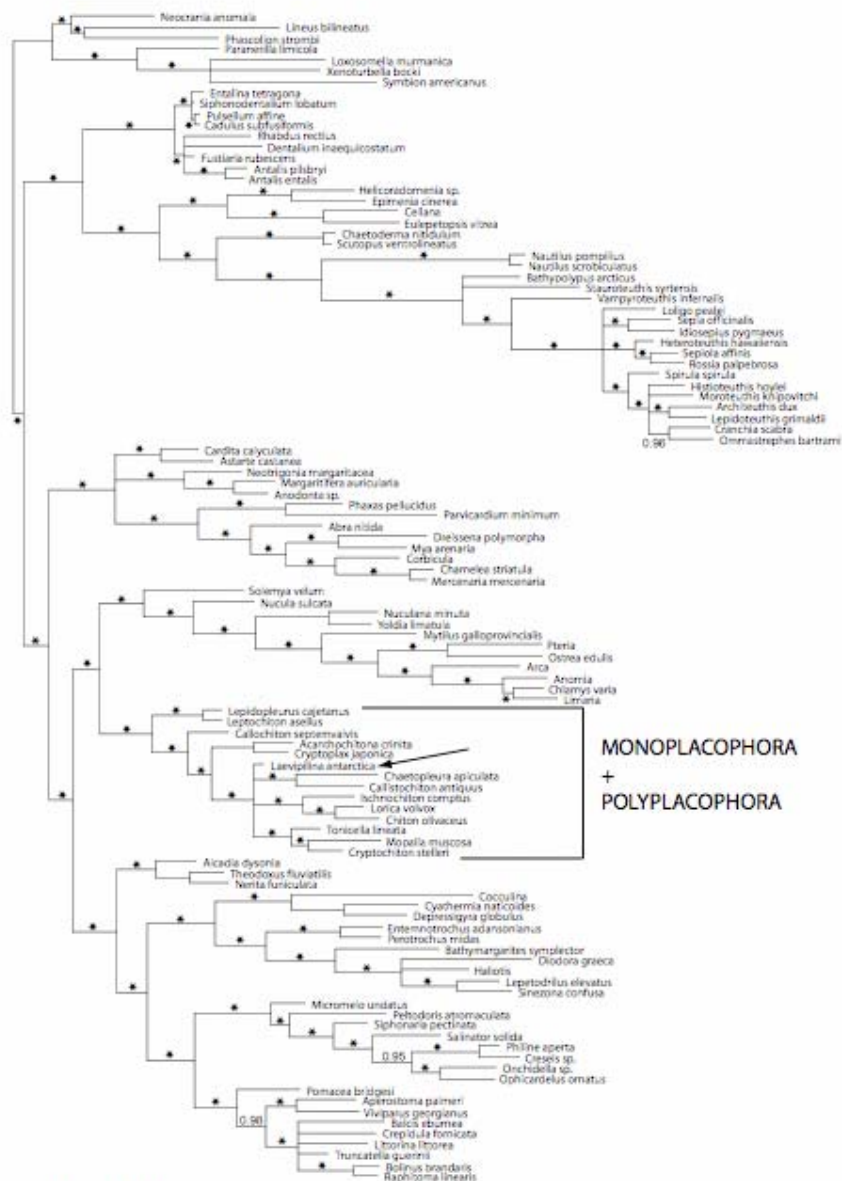

MONOPLACOPHORA  
+  
POLYPLACOPHORA

— 100 changes

Supplement: pnas_0602578103_1.pdf [file pnas_0602578103_1.pdf]
